# Supplementary material for: Cell-type-specific imaging of neurotransmission reveals a disrupted excitatory-inhibitory cortical network in isoflurane anaesthesia
Source: PubMed Central journal article supplement — eBioMedicine. 2021 Mar 7;65:103272. doi: 10.1016/j.ebiom.2021.103272 (PMC7941179; doi:10.1016/j.ebiom.2021.103272), 2021-03-07
Supplement: mmc2.pdf [file mmc2.pdf]

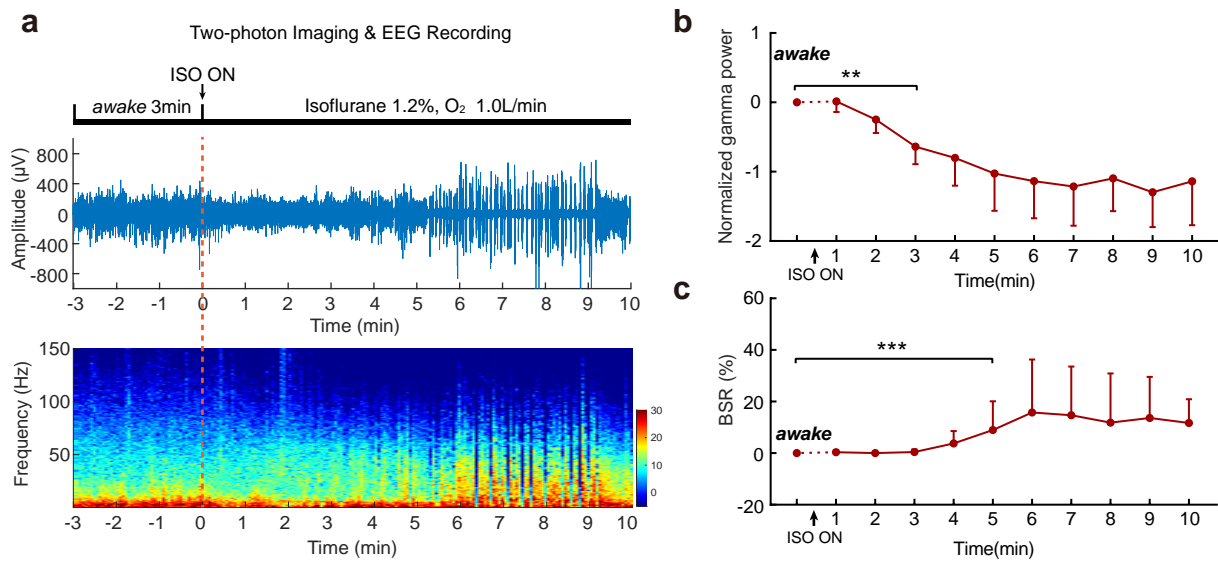

**Fig. S1** EEG recording showing that the volatile inhalation apparatus can induce stable unconsciousness under isoflurane anaesthesia. **a** A representative EEG raw trace (middle) and power spectrogram (bottom) during the imaging process (Up). **b** Normalized gamma power within 1 to 10 minutes after isoflurane administration (n=15 mice). Kruskal-Wallis one-way ANOVA with Dunn's multiple comparisons. **c** Burst suppression ratio (BSR) within 1 to 10 minutes after isoflurane administration. Kruskal-Wallis one-way ANOVA with Dunn's multiple comparisons. Data with error bars are presented as the mean  $\pm$  SD, \*\* $p < 0.01$ , \*\*\* $p < 0.001$ .

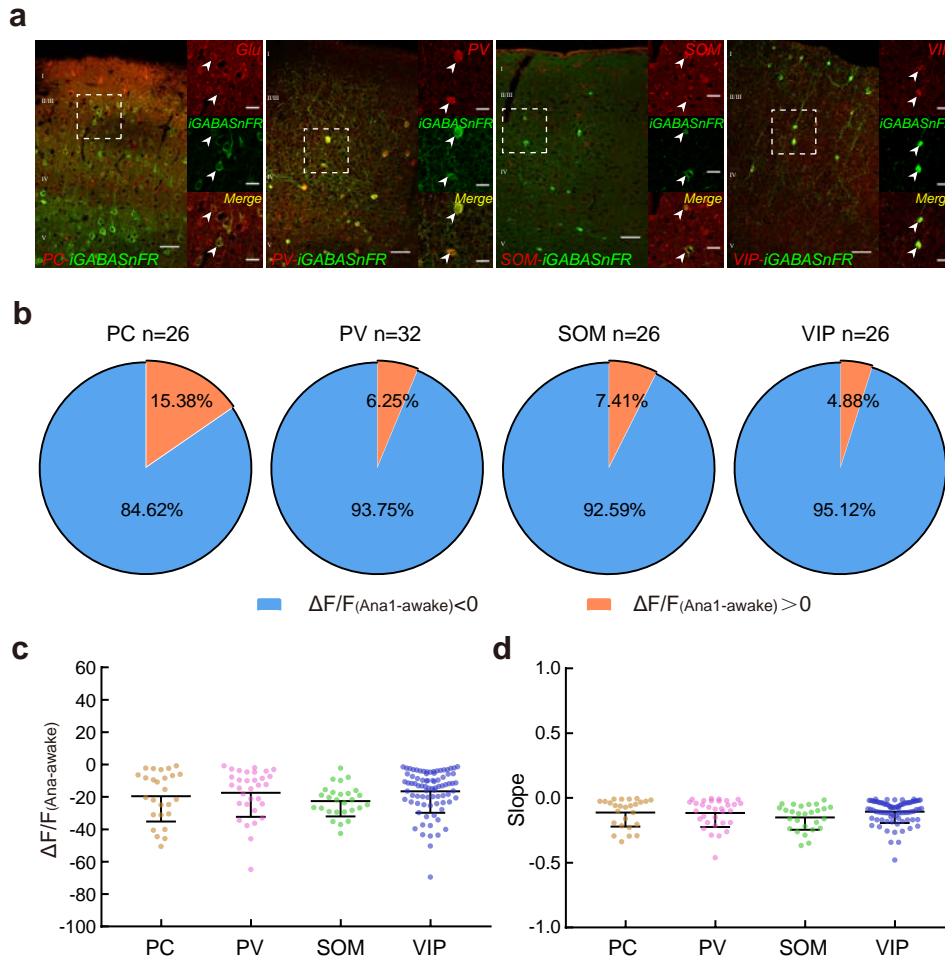

**Fig. S2** Rapid reduction in and undifferentiated maximal inhibitory effect of GABA transmission among cortical cell subtypes. **a** Coexpression of GCaMP6m (green) in PV+, SOM+, and VIP+ neurons (red) in layer 2/3 of the V1 cortex. Scale bars: 50  $\mu\text{m}$  (left) and 20  $\mu\text{m}$  (right). Arrowheads indicate coexpressing cells. **b** The percentage of  $\Delta F/F(\text{Ana1-awake}) > 0$  within the pyramidal, PV, SOM, and VIP neurons. **(c, d)** The  $\Delta F/F(\text{Ana1-awake})$  (**c**) and slope (**d**) of pyramidal, PV, SOM, and VIP neurons. Kruskal-Wallis one-way ANOVA with Dunn's multiple comparisons. Data with error bars are presented as the mean  $\pm$  SD.

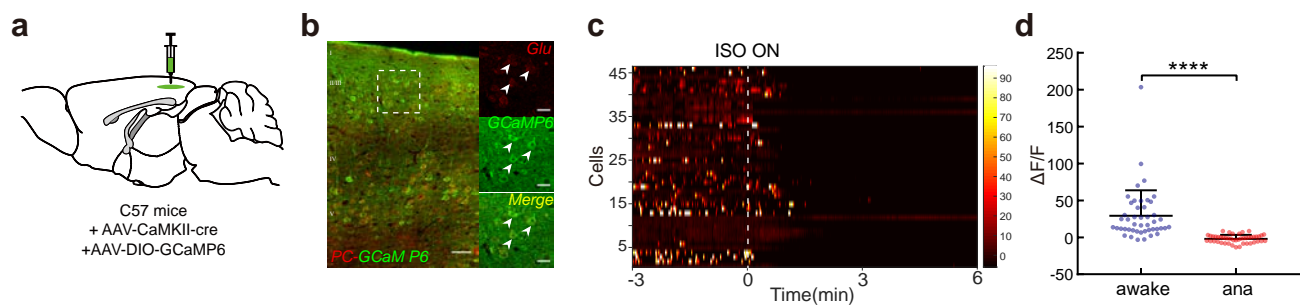

**Fig. S3** Decreased calcium activity of pyramidal cells. **a** Injection of AAV-CaMKII-cre and AAV-DIO-GCaMP6m virus into the V1 cortex of C57BL/6J mice. **b** Coexpression of GCaMP6m (green) and glutamate in the pyramidal cells (red) in layer 2/3 of the V1 cortex. Scale bars: 50  $\mu$ m (left) and 20  $\mu$ m (right). Arrowheads indicate cells with coexpression. **c** Heatmap of the calcium activity of pyramidal cells under isoflurane anaesthesia. White dashed line, administration of isoflurane. **d**  $\Delta F/F$  difference in pyramidal neuronal calcium activity between the awake state and anaesthetized state ( $n=46$  neurons from 5 mice). Paired two-tailed Wilcoxon test. Data with error bars are presented as the mean  $\pm$  SD, \*\*\*\* $p < 0.0001$ .

Figure S4

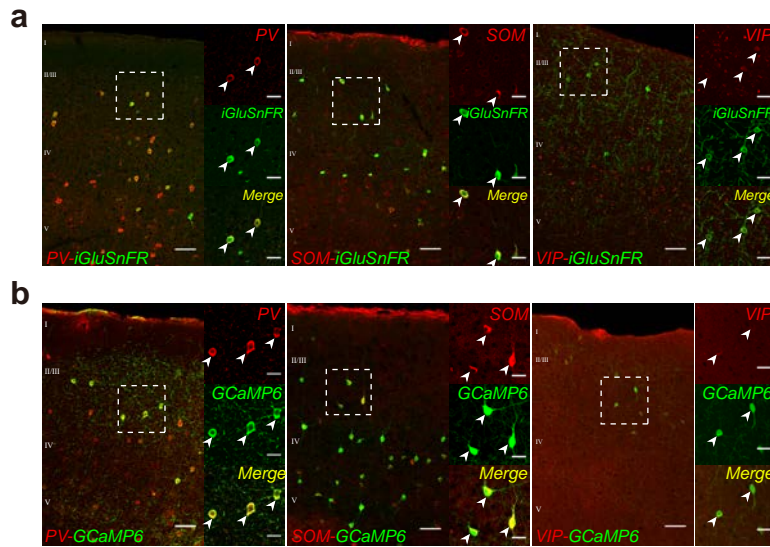

**Fig. S4** Expression of AAV-DIO-iGluSnFR and AAV-DIO-GCaMP6m in PV, SOM, and VIP interneurons. **(a, b)** Coexpression of GCaMP6m **(a, green)** and iGluSnFR **(b, green)** in PV+, SOM+, and VIP+ neurons (red) in layer 2/3 of the V1 cortex. Scale bars: 50 μm (left) and 20 μm (right). Arrowheads indicate coexpressing cells.
